# Supplementary material
Source: publisher figshare collection journal article supplement (https://acs.figshare.com/ndownloader/files/4225354)
Supplement: Supplementary file 1 [file 4225354]

**Supporting Information**  
**for**  
**Fluorinated Ethylene Carbonate as Electrolyte Additive for**  
**Rechargeable Na Batteries**

*Shinichi Komaba,\*<sup>a</sup> Toru Ishikawa,<sup>a</sup> Naoaki Yabuuchi,<sup>a</sup> Wataru Murata,<sup>a</sup> Atsushi Ito,<sup>b</sup> and  
Yasuhiko Ohsawa<sup>b</sup>*

*a* Department of Applied Chemistry, Tokyo University of Science, 1-3 Kagurazaka, Shinjuku,  
Tokyo 162-8601, Japan

\*E-mail: [komaba@rs.kagu.tus.ac.jp](mailto:komaba@rs.kagu.tus.ac.jp)

*b* Nissan Research Center, Nissan Motor Co., Ltd., 1 Natsushima-cho, Yokosuka, Kanagawa  
237-8523, Japan

## ***Experimental***

The reagent grade sodium metal, poly(vinylidene fluoride) (Wako Pure Chemical Industries, Ltd.), battery grade ethylene carbonate (EC), propylene carbonate (PC), dimethyl carbonate (DMC), vinylene carbonate (VC), NaClO<sub>4</sub> (containing ca. 100 ppm H<sub>2</sub>O), NaPF<sub>6</sub>, NaN(SO<sub>2</sub>CF<sub>3</sub>)<sub>2</sub> (Kishida Chemical Co., Ltd.), fluoroethylene carbonate (FEC), *t*-di fluoroethylene carbonate (DFEC) (Kanto Denka Kogyo Co., Ltd.) and commercially available hard-carbon (Carbotron P(J), Kureha Co.) (ref. 4) are used. All chemicals are handled in an Ar-filled glove box (whose dew point ranges from –85 to –70°C). The NaNi<sub>1/2</sub>Mn<sub>1/2</sub>O<sub>2</sub> was synthesized as we previously described (ref. 4). For the electrode preparation, hard-carbon (90 wt%) was mixed with PVdF binder (10 wt%) in *N*-methylpyrrolidinone. The obtained slurry was doctor-bladed onto Al or Cu foil. The NaNi<sub>1/2</sub>Mn<sub>1/2</sub>O<sub>2</sub> (80 wt%) and acethylene black (10 wt%) were mixed with PVdF (10 wt%) in *N*-methylpyrrolidinone, and thus obtained slurry was cast onto Al foil. The electrodes were dried at > 80°C in a vacuum prior to use. The coin-type cells (20 mm diameter, 3.2 mm thickness) with hard-carbon or NaNi<sub>0.5</sub>Mn<sub>0.5</sub>O<sub>2</sub>, and excess Na metal electrodes, electrolyte, and a glass fiber filter (thickness: 0.38 mm, Toyo Roshi Kaisha, Ltd.) as a separator were fabricated in the glove-box.

The electrodes were observed by using a scanning electron microscope (SEM, S-5000, Hitachi), transmission electron microscope (TEM, 200 kV, H-9500, Hitachi), and X-ray photoelectron spectrometer (XPS, JPS-9010MC, JEOL) equipped with monochromatic Mg K $\alpha$  X-ray source with depth profiling by argon ion beam sputtering. The electrolyte solution within separator was analyzed by attenuated total reflection-Fourier transform infrared spectroscopy (ATR FT-IR, NICOLET6700, Thermo Scientific. Co. Ltd.).

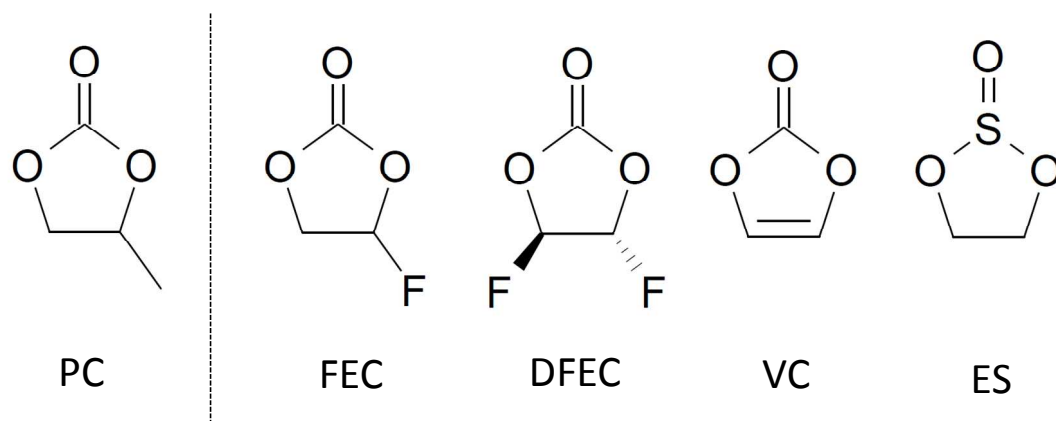

**Figure S1.** Molecular structures of electrolyte additives used in Na cells.

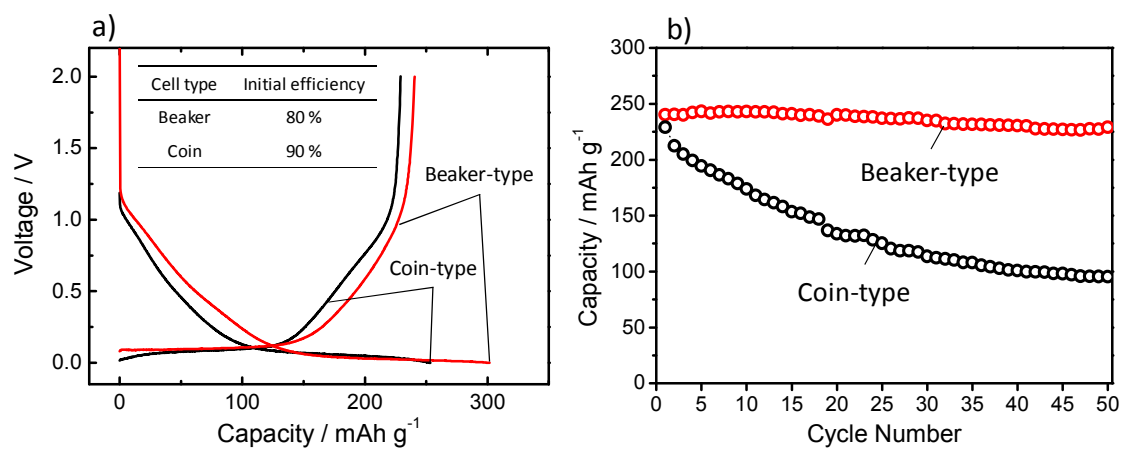

**Figure S2.** (a) The initial reduction/oxidation curves (inset: initial efficiency defined as  $Q_{\text{oxidation}}/Q_{\text{reduction}}$ ) and (b) reversible capacity variation for hard-carbon electrodes in a 1 mol dm<sup>-3</sup> NaClO<sub>4</sub> PC solution comparing results in beaker-type or coin-type Na cells at a rate of 25 mA g<sup>-1</sup>.

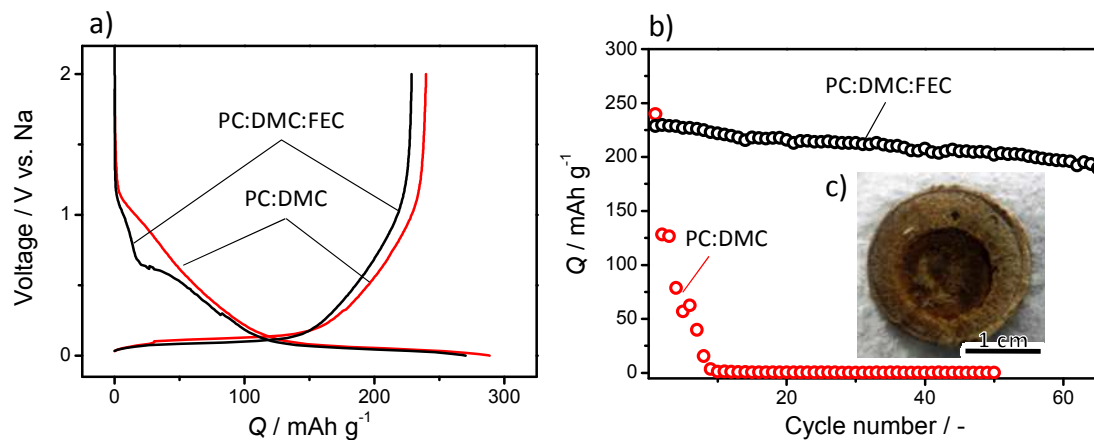

**Figure S3.** (a) The initial reduction/oxidation curves and (b) reversible capacity variation for hard-carbon on Al foil in 1 mol dm<sup>-3</sup> NaClO<sub>4</sub> PC:DMC (1:1) solutions with and without 2 vol% FEC additive tested at a rate of – 25 and + 25 mA g<sup>-1</sup> in coin-type Na cells. (c) A photo of separator tested in the FEC-free PC:DMC after 50 cycles.

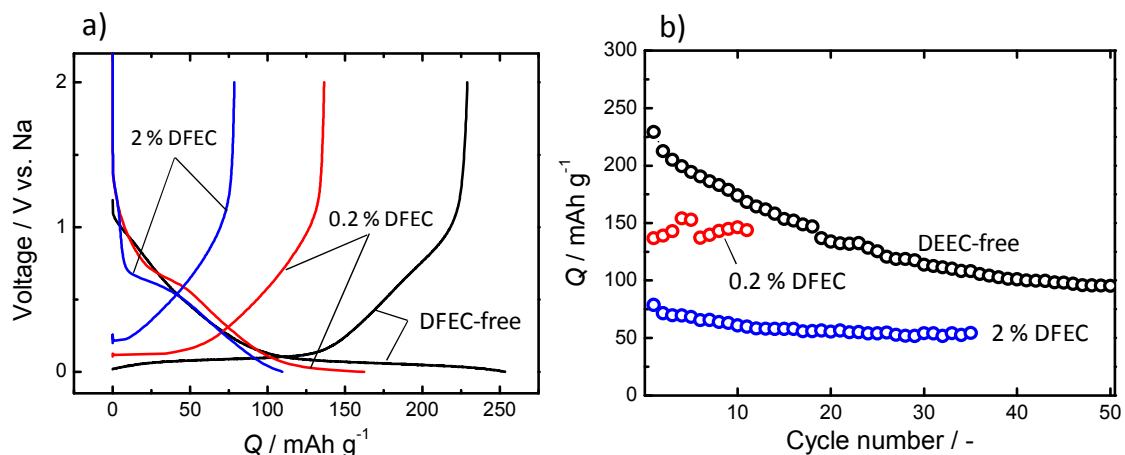

**Figure S4.** (a) The initial reduction/oxidation curves and (b) reversible capacity variation for hard-carbon electrodes in 1 mol dm<sup>-3</sup> NaClO<sub>4</sub> PC solutions with and without 0.2 and 2 vol% DFEC examined at a rate of - 25 and + 25 mA g<sup>-1</sup> in coin-type Na cells.

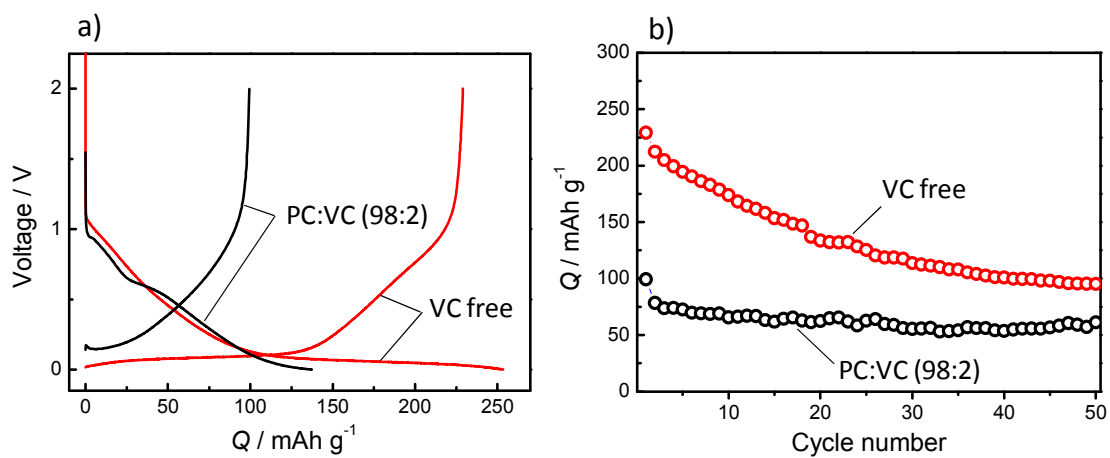

**Figure S5.** (a) The initial reduction/oxidation curves and (b) reversible capacity variation for hard-carbon electrodes in  $1 \text{ mol dm}^{-3} \text{NaClO}_4$  PC solutions with and without 2 vol% VC examined at a rate of  $-25$  and  $+25 \text{ mA g}^{-1}$  in coin-type Na cells.

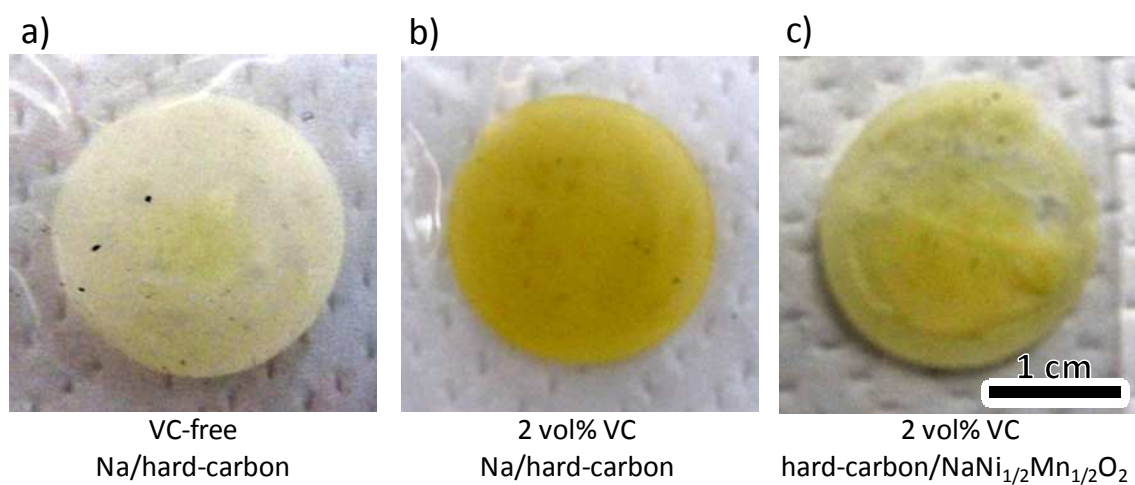

**Figure S6.** Photographs of the used glass-separators in coin-type cells of Na//hard-carbon (half cell) configuration with 1 mol dm<sup>-3</sup> NaClO<sub>4</sub> in a) PC and b) PC:VC (98:2 volume) and c) hard-carbon//NaNi<sub>1/2</sub>Mn<sub>1/2</sub>O<sub>2</sub> (Na-ion full cell) configuration with the 2 vol% VC solution after the first galvanostatic cycle.



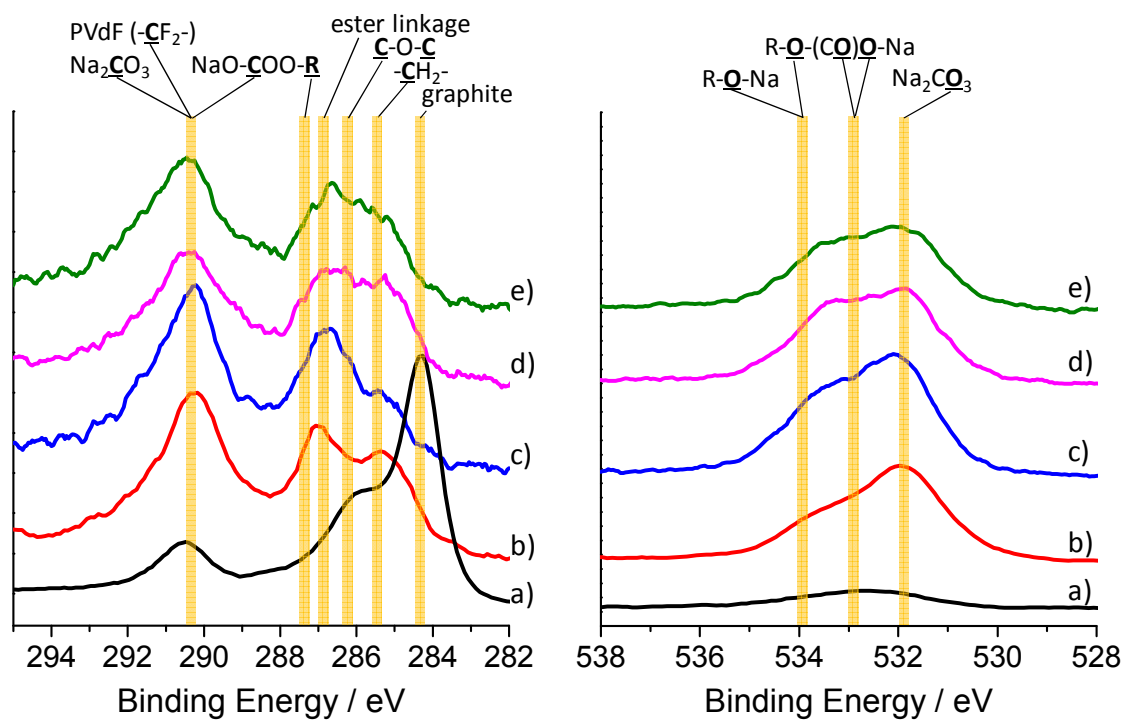

**Figure S7.** (left) C 1s and (right) O 1s X-ray photoelectron spectra for hard-carbons: a) pristine and hard-carbon electrodes after the first galvanostatic cycle test in 1 mol dm<sup>-3</sup> NaClO<sub>4</sub> PC b) without and with c) 0.5, d) 2, and e) 10 vol% FEC addition in Na cells.

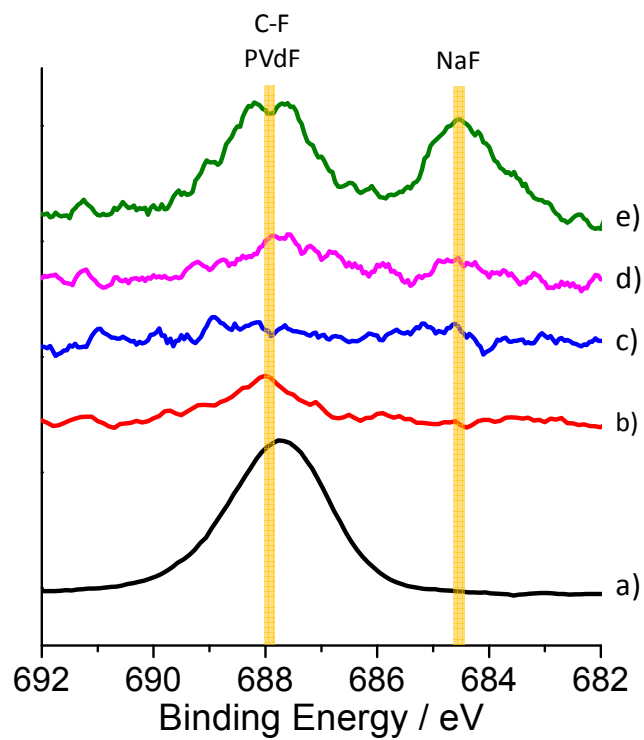

**Figure S8.** F 1s XPS spectra for hard-carbons: a) pristine and hard-carbon electrodes after the first galvanostatic cycle test in 1 mol dm<sup>-3</sup> NaClO<sub>4</sub> PC b) without and with c) 0.5, d) 2, and e) 10 vol% FEC addition in Na cells.

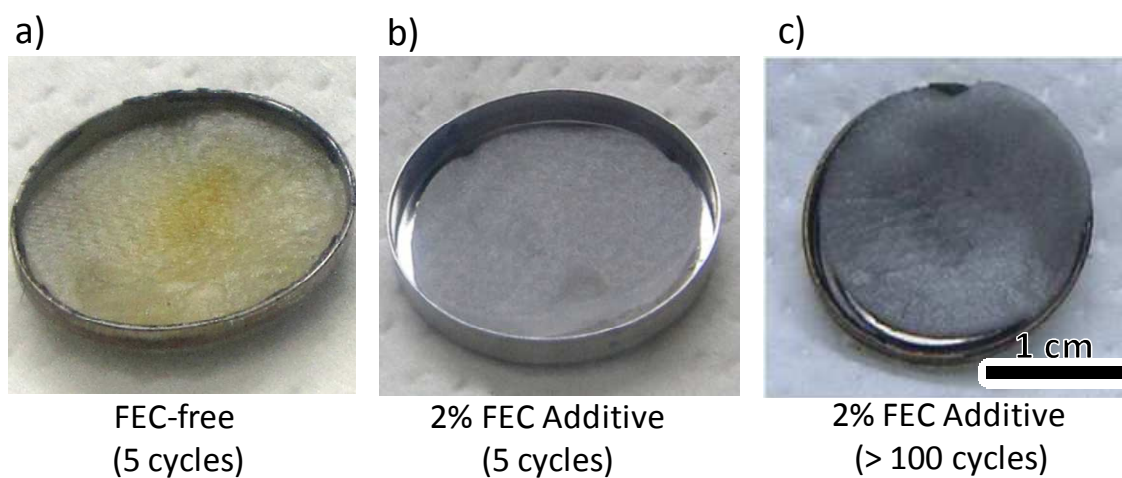

**Figure S9.** Photographs of the used glass-separators in coin-type cells of Na//hard-carbon cell with  $1 \text{ mol dm}^{-3} \text{ NaClO}_4$  in a) PC after 5 cycles, and b) PC:FEC (98:2 in volume) after b) 5 and c) 133 cycles.

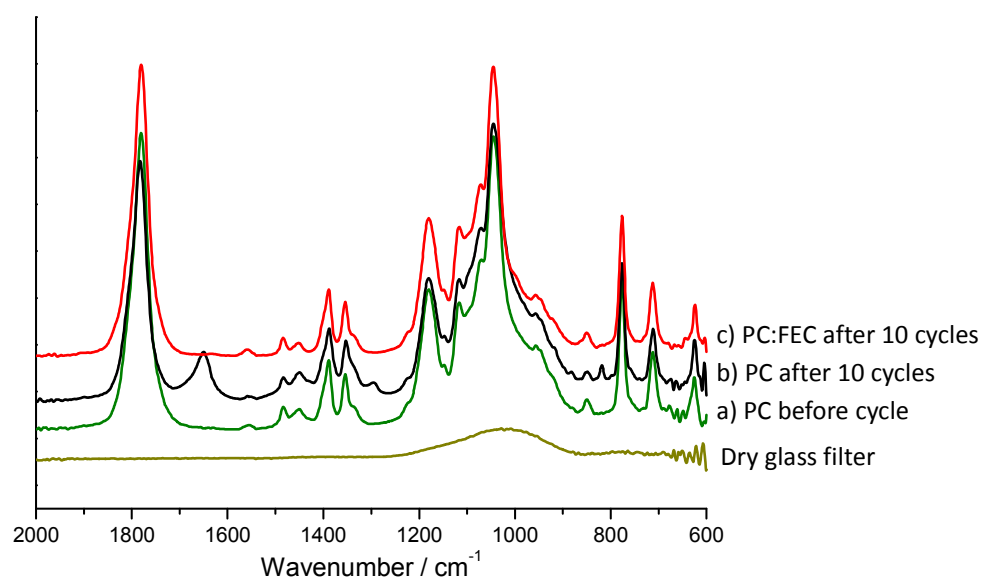

**Figure S10.** FT-IR spectra of the electrolyte solutions held in glass-separators a) before and after electrochemical tests in coin-type cells of Na//hard-carbon cell with 1 mol dm<sup>-3</sup> NaClO<sub>4</sub> in b) PC after 10 cycles, and c) PC:FEC (98:2 in volume) after 10 cycles. Arrows indicate the peaks of decomposition products such as sodium alkoxides and/or sodium alkyl carbonates. A result of pristine glass-separator without any electrolyte solutions is shown for comparison.

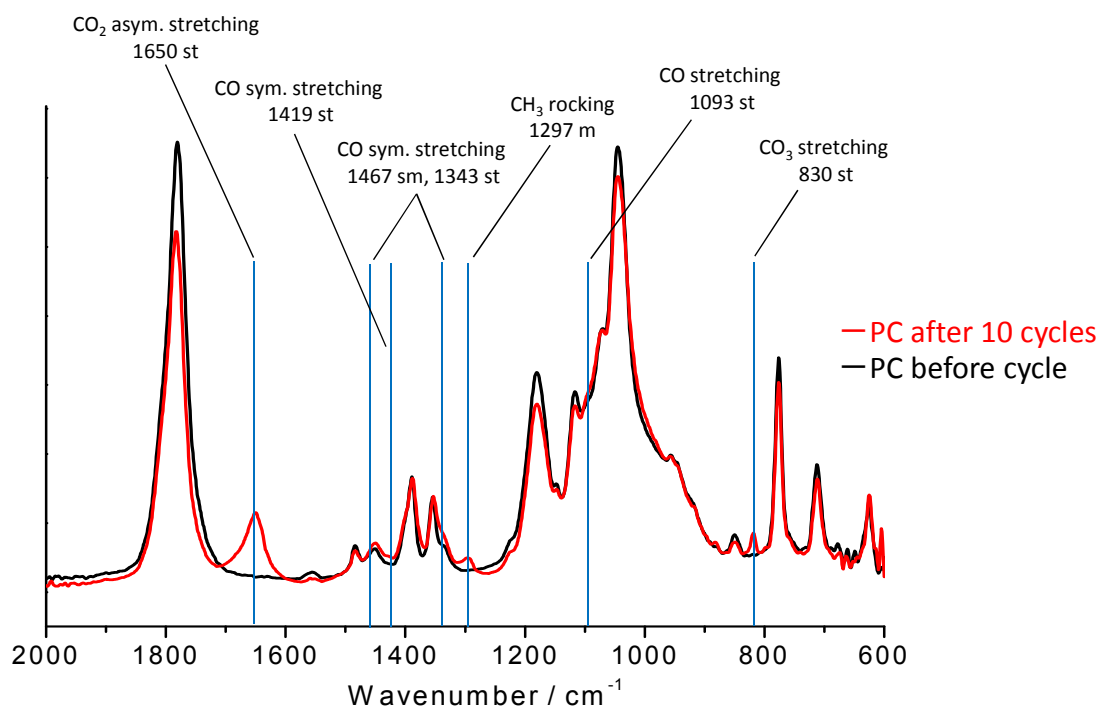

**Figure S11** Comparison of FT-IR spectra of the electrolyte solutions held in glass-separators (black) before and (red) after 10 cycle tests in coin-type cells of Na//hard-carbon cell with 1 mol dm<sup>-3</sup> NaClO<sub>4</sub> in PC. Additional peaks due to decomposition product are indexed as sodium propyl carbonate according to the literatures.

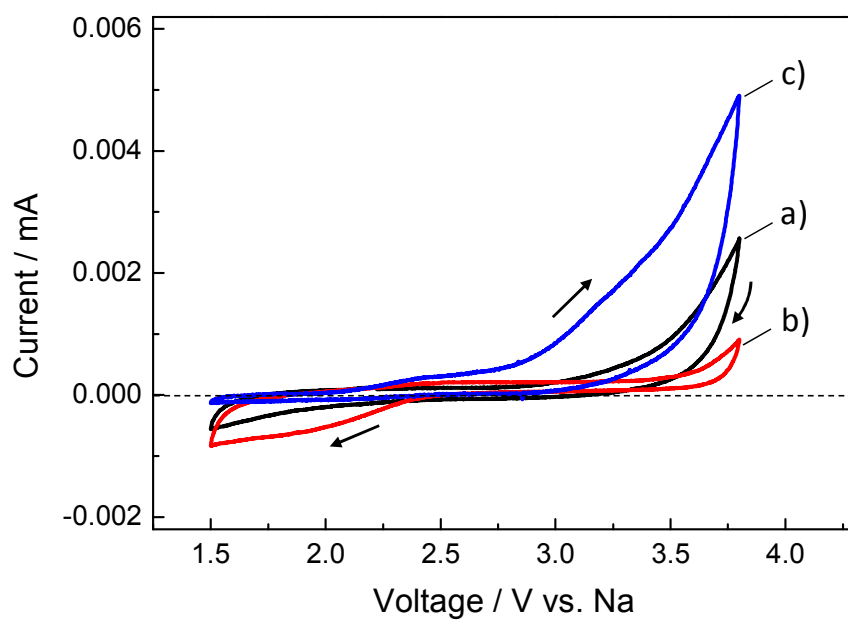

**Figure S12.** Cyclic voltammograms at the third cycle for Al foil electrodes (10 mm in diameter) at  $0.2 \text{ mV s}^{-1}$  in  $1 \text{ mol dm}^{-3} \text{ NaClO}_4$  in a) PC, b) PC:FEC (98:2 in volume), and c) the PC used in hard-carbon//Na cell after 10 galvanostatic cycles in coin-type Na cells.
